# Supplementary material for: Activity-dependent CO2 production in the axon triggers opening of Connexin32 in the Schwann cell paranode
Source: eLife. 2026 Jul 6;14:RP107085. doi: 10.7554/eLife.107085 (PMC13336771; doi:10.7554/eLife.107085)
Supplement: Figure 2—figure supplement 2—source data 1. [file elife-107085-fig2-figsupp2-data1.xlsx]

## Sheet: Fig2 FS2
Cx32 vs CytC				SFXN1 vs CytC
Test		Control		Test		Control
M1	M2	M1	M2	M1	M2	M1	M2
0.4322	0.123324	0.03242	0.0123534	0.563424	0.234564	0.0003254	0.0004325
0.2343	0.234423	0.000123	0.000345	0.621321	0.521341	0.000235	0.0202135
0.42342	0.344432	0.00123	0.0003453	0.632412	0.623123	0.00235	0.01234
0.32412	0.343434	0.08123	0.00345345	0.734241	0.534636	0.0012351	0.0002314
0.11232	0.36745	0.0021423	0.000634	0.343635	0.543263	0.001235	0.02134
0.234234	0.123465	0.000324	0.00023424	0.654341	0.452234	2.3523e-05	0.000235123
0.439583	0.289278	0.00234	0.00234	0.425235	0.32465	0.00234	0.01234
