# Supplementary material for: Activity-dependent CO2 production in the axon triggers opening of Connexin32 in the Schwann cell paranode
Source: eLife. 2026 Jul 6;14:RP107085. doi: 10.7554/eLife.107085 (PMC13336771; doi:10.7554/eLife.107085)
Supplement: Figure 2—source data 1. [file elife-107085-fig2-data1.xlsx]

## Sheet: Fig2
AQP1 vs Cx32
Test		Control
M1	M2	M1	M2
0.62412	0.24234	0.00234	1.235e-05
0.123423	0.324235	0.00234	1.25e-05
0.23525	0.243423	0.00324534	5.125e-05
0.323543	0.423412	2.135e-05	5.123e-05
0.352345	0.523422	0.000231541	0.000525
0.432563	0.234523	1.23512e-05	5.1235e-06
0.521342	0.285245	1.52345e-05	0.000124
0.587929	0.134234	0.100001	1.52e-05
