# Supplementary material for: Activity-dependent CO2 production in the axon triggers opening of Connexin32 in the Schwann cell paranode
Source: eLife. 2026 Jul 6;14:RP107085. doi: 10.7554/eLife.107085 (PMC13336771; doi:10.7554/eLife.107085)
Supplement: Figure 4—figure supplement 1—source data 1. [file elife-107085-fig4-figsupp1-data1.xlsx]

## Sheet: Fig4 FS1
Cx31.3 -	Cx31.3 -	Cx31.3 +	Cx31.3 +
70 mmHg	50 mM KCl	70 mmHg	50 mM KCl
0.010715	0.014234	0.013214	3.38255
0.002602	0.003423	0.0259	3.61897
-0.002786	0.000234	0.004357	2.99811
-0.051155	-0.041241	0.023871	2.83478
-0.513632	-0.23234	0.026902	3.18101
-0.96487	-0.324325	0.017972	3.2898
0.010367	0.045636	-0.123176	5.33148
0.012238	0.05622	-0.015619	3.58162
0.01187	0.045524	-0.024224	3.80532
		-0.218282	2.88334
		-0.210007	3.01012
		-0.128854	2.60793
		-0.222739	2.99933
		-0.194879	2.8655
