# Supplementary material for: Activity-dependent CO2 production in the axon triggers opening of Connexin32 in the Schwann cell paranode
Source: eLife. 2026 Jul 6;14:RP107085. doi: 10.7554/eLife.107085 (PMC13336771; doi:10.7554/eLife.107085)
Supplement: Figure 6—figure supplement 1—source data 1. [file elife-107085-fig6-figsupp1-data1.xlsx]

## Sheet: Fig6 FS1 A
Acetazolamide	Before					Pre-incubation					After
20	0.627168	1.13407	1.30994	-0.150572	0.0389721	0.324524	1.12343	1.24423	1.11241	0.324124	0.1224	0.632423	1.12355	1.88823	1.88841
40	0.250227	-0.684768	1.0163	0.342593	1.16742	0.0123421	-0.123432	1.21321	0.00213123	0.32425	1.11234	1.32412	1.91324	-0.00124	0.012312
60	-1.31759	1.46639	2.23104	-0.08009	0.226315	-1.24518	1.23535	2.32423	-0.083214	0.212343	-1.34425	1.57646	1.32423	-0.0821009	2.26315
80	-0.280673	0.586563	-1.0835	0.741119	2.16212	0.234242	0.532459	-1.23458	1.32474	1.6212	-0.280673	1.12412	1.21245	0.123412	2.00321
100	1.62836	-1.7538	1.69795	2.34139	0.161096	1.86554	-1.32424	1.45335	2.23534	0.345316	1.23213	1.22346	0.032421	0.0234123	1.23142
120	0.7591	0.295962	2.24912	0.237233	2.85327	0.435759	1.03535	2.43534	0.435345	3.03253	-0.324234	1.11341	2.52214	1.12342	1.92354
140	1.13616	2.35156	0.895175	2.56108	0.559821	1.43514	2.03453	1.0459	2.43535	0.546435	1.43623	4.35156	0.895175	2.56108	0.559821
160	1.86613	0.326296	1.72457	0.879335	2.55038	3.45345	3.74574	0.342345	3.24534	2.3435	2.51236	2.13423	2.35235	4.23142	1.23234
180	1.25269	2.4823	1.96042	2.87917	2.83226	1.46325	3.52345	1.32523	3.53523	2.35235	3.2142	0.023023	1.24235	0.002352	0.002342
200	3.44671	3.68615	4.00141	1.8383	1.96693	3.23542	3.22569	4.2525	3.42358	2.32597	3.42342	3.23424	4.23423	1.23484	2.34967
220	3.30538	2.79126	2.00942	3.89279	3.67704	3.23453	3.01235	2.25024	3.24589	3.92358	3.23431	2.76879	2.67801	3.56789	3.56768
240	3.92343	2.68656	4.21315	2.03072	2.9895	4.32422	3.32525	4.23425	2.23435	3.43524	3.92343	2.68656	4.21315	2.03072	2.9895
260	6.15033	3.09945	5.81591	3.73058	3.40629	4.32125	3.43563	2.32346	3.56745	4.02316	5.34235	3.24534	4.46436	4.12342	4.23425
280	3.86818	3.17132	3.94103	3.1916	1.19822	4.32532	2.35436	4.56463	5.00324	4.01235	5.22345	4.56325	4.53462	4.55232	3.43252
300	4.16062	5.7193	6.65698	4.69059	3.25987	4.32125	4.32433	5.43221	4.34534	2.93242	4.12435	5.34257	5.65698	5.23545	4.14353
320	4.2826	5.494	3.82051	4.37318	7.28152	3.56435	4.54654	6.54324	3.94235	4.46545	4.23423	5.42145	4.02051	4.41244	7.34256
L- Phenylalanine
20	0.578308	0.574341	0.662231	0.800781	0.506287	0.535889	0.523466	0.452363	0.634523	0.343673	0.552351	0.454352	0.523652	0.532523	0.623412
40	0.484924	0.422974	0.693359	1.38977	0.768433	0.577698	0.523412	0.452365	0.623423	0.412313	0.652135	0.52463	0.555234	0.617643	0.625341
60	0.301208	0.677185	0.843201	1.26648	0.871582	0.588684	0.565463	0.534223	0.675438	0.464352	0.652315	0.665377	0.588655	0.688846	0.623412
80	0.402832	0.584412	0.620728	2.16858	0.959778	0.742798	0.723421	0.623655	0.72134	0.887123	0.734523	0.732412	0.623412	0.712341	0.721342
100	0.699158	0.456238	0.774536	0.784302	0.917053	0.870972	0.832423	0.723149	0.734223	0.888321	0.923423	0.882314	0.721342	0.777234	0.923042
120	0.885925	0.727844	1.15204	1.64581	1.11725	0.914612	0.923415	0.324352	0.923142	1.03242	1.02314	0.93242	0.992342	0.991234	1.02134
140	1.31622	1.26923	1.23566	1.71478	1.25854	1.38916	1.34235	1.23245	1.23423	1.32354	1.23242	1.12314	1.3213	1.23422	1.35245
160	1.59668	1.30035	1.61743	1.77673	1.70105	1.41418	1.52141	1.52314	1.44341	1.45435	1.42541	1.5512	1.50123	1.45247	1.44123
180	1.78741	1.7395	1.87561	2.14325	1.96655	1.9043	2.01234	2.12113	2.03242	1.92544	1.93214	2.11112	2.00032	1.94124	1.99912
200	2.31476	2.26501	2.33002	2.2699	2.08862	2.06909	2.03242	2.23423	2.22241	2.24325	2.11213	2.34213	2.22214	2.23243	2.19912
220	2.47833	2.29919	2.39166	2.73041	2.49908	2.66998	2.51212	2.52341	2.51242	2.5432	2.52312	2.62342	2.54123	2.42521	2.66345
240	2.68463	2.5531	2.67578	3.08319	2.73163	2.67029	2.72135	2.73409	2.67897	2.78454	2.83242	2.78328	2.78999	2.62314	2.80003
260	3.25165	2.91962	3.23242	3.09906	2.93976	2.95624	3.05124	3.1213	3.11242	3.12341	2.99923	3.00001	3.11212	3.11123	3.19829
280	3.06	2.96173	3.21045	3.31055	2.80823	3.18878	3.23131	3.22142	3.32242	3.33437	3.42351	3.36748	3.22235	3.33454	3.42131
300	3.38409	3.48389	3.61542	3.4552	3.302	3.56873	3.52355	3.43544	3.45787	3.56343	3.55636	3.53458	3.45346	3.55234	3.45534
320	3.54675	3.65814	3.61115	3.47443	3.89954	3.67035	3.56424	3.52314	3.66744	3.73234	3.66345	3.52523	3.50031	3.60002	3.55432

## Sheet: Fig6 FS1 B
Acetazolamide				L-Phenylalanine
Before	Pre-incubation	After		Before	Pre-incubation	After
1.86613	3.45345	2.51236		1.41418	1.41418	1.42541
1.03263	3.74574	2.13423		1.30035	1.52141	1.5512
1.72457	0.842345	2.35235		1.61743	1.52314	1.50123
1.37933	2.45345	4.23142		1.57673	1.44341	1.45247
2.95038	2.3435	1.23234		1.45435	1.45435	1.44123
