# Supplementary material for: Activity-dependent CO2 production in the axon triggers opening of Connexin32 in the Schwann cell paranode
Source: eLife. 2026 Jul 6;14:RP107085. doi: 10.7554/eLife.107085 (PMC13336771; doi:10.7554/eLife.107085)
Supplement: Figure 6—source data 1. [file elife-107085-fig6-data1.xlsx]

## Sheet: Fig6B
Control					AZ			L-Phe
1 min	3 min	5 min	10 min		1 min	3 min		5 min
67.1	133.41	202.457	423.234		316.912	414.083		10.324
58.9	126.89	192.252	523.63		407.743	366.832		5.81
39.5	130.89	321.491	482.67		431.32	364.099		10.242
10.1	130.993	202.399	324.774		201.519	532.682		23.342
70.5	127.245	184.036	522.464		306.584	425.238		63.319
69.24	128.99	199.469	488.654		310.707	470.407		22.2342
		221.641	389.94		321.596	411.485		15.3245
		243.153			173.423	480.9		11.2353
					102.427			5.32423
								9.32523

## Sheet: Fig6D
Control	L-Phe
10.324	170.976
5.81	193.43
10.242	251.411
23.342	242.521
63.319	233.343
22.2342	222.324
15.3245	256.325
11.2353	333.424
5.32423	266.324
9.32523	277.234
