# Supplementary material for: Activity-dependent CO2 production in the axon triggers opening of Connexin32 in the Schwann cell paranode
Source: eLife. 2026 Jul 6;14:RP107085. doi: 10.7554/eLife.107085 (PMC13336771; doi:10.7554/eLife.107085)
Supplement: Figure 7—figure supplement 1—source data 1. [file elife-107085-fig7-figsupp1-data1.xlsx]

## Sheet: Fig 7 FS 1A
	before					during					after
20	0.0594571	0.0495471	0.0394571	0.095471	0.0934347	0.206638	0.227374	0.205753	0.228412	0.187534	0.219501	0.203983	0.173755	0.250598	0.212833
40	0.09746	0.09746	0.09746	0.09746	0.09746	0.222842	0.175464	0.196445	0.200137	0.227405	0.173755	0.201846	0.218906	0.221255	0.20177
60	0.49846	0.49846	0.49846	0.49846	0.49846	0.198749	0.229343	0.191882	0.210147	0.203983	0.218906	0.174991	0.19736	0.174915	0.209995
80	0.111194	0.09471	0.08739	0.46947	0.39409	0.206348	0.20174	0.20293	0.196185	0.201846	0.237507	0.42016	0.42016	0.42307	0.237507
100	0.103259	0.09746	0.52562	0.5421	0.42858	0.39551	0.42097	0.202637	0.237507	0.35675	0.09471	0.47985	0.5421	0.42016	0.103259
120	0.297656	0.49846	1.587	0.87596	1.3908	0.5421	0.47985	0.39409	0.46947	0.08739	0.09746	1.349	0.87596	0.42116	0.297656
140	0.46031	1.3923	2.0609	1.7088	1.8293	0.87596	1.349	0.42858	1.2965	0.52562	0.49846	1.674	2.0088	0.42122	0.46031
160	1.1345	1.9186	2.2854	2.0292	2.1463	2.0088	1.674	1.3908	1.9828	1.587	1.6923	2.3872	2.3292	0.5421	1.5345
180	1.89235	2.3524	2.6354	2.3979	2.3771	2.3292	2.3872	2.1293	2.3771	2.2609	2.1186	2.7818	2.6979	0.87596	2.1235
200	2.5401	2.7757	2.7809	2.6213	2.7891	2.6979	2.7818	2.3463	2.4217	2.6854	2.6524	2.7867	2.6213	2.0088	2.5401
220	2.7342	2.8611	2.7327	2.6673	2.9164	2.6213	2.7867	2.6771	2.5703	2.7354	2.7757	2.8337	2.6673	2.3292	2.7342
240	2.7571	2.7781	2.6811	3.0122	2.6811	2.6673	2.8337	2.7891	2.8627	2.7809	2.8611	2.8392	3.0122	2.6979	2.7571
260	2.8443	2.8108	2.5596	2.7949	2.7751	3.0122	2.8392	2.9164	2.7522	2.7327	2.7781	2.8434	2.7949	2.6213	2.8443
280	2.8727	2.8495	2.5666	2.7998	2.7446	2.7949	2.8434	2.6811	2.7455	2.6811	2.8108	2.8572	2.7998	2.6673	2.8727
300	2.8062	2.8657	2.5172	2.8599	2.8373	2.7998	2.8572	2.7751	2.7528	2.5596	2.8495	2.8468	2.8599	2.7531	2.8062
320	2.8428	2.7864	2.4479	2.9341	2.9002	2.8599	2.8468	2.7446	2.6911	2.5666	2.9341	3.054	3.4806	2.776	3.3369

## Sheet: Fig 7FS 1B
Before	Pre-incubation	After
1.1345	2.0088	1.6923
1.9186	1.674	2.3872
2.2854	1.3908	2.3292
2.0292	1.9828	0.5421
2.1463	1.587	1.5345
