# Supplementary material for: Activity-dependent CO2 production in the axon triggers opening of Connexin32 in the Schwann cell paranode
Source: eLife. 2026 Jul 6;14:RP107085. doi: 10.7554/eLife.107085 (PMC13336771; doi:10.7554/eLife.107085)
Supplement: Figure 7—source data 1. [file elife-107085-fig7-data1.xlsx]

## Sheet: Fig 7B
H2O2	Control
0.675	202.457
0.794	192.252
50.752	321.491
31.487	202.399
160.819	184.036
0.752	199.469
1.487	221.641
0.752	243.153
76.783
74.167
124.192
35.333
9.511
