# Supplementary material for: Activity-dependent CO2 production in the axon triggers opening of Connexin32 in the Schwann cell paranode
Source: eLife. 2026 Jul 6;14:RP107085. doi: 10.7554/eLife.107085 (PMC13336771; doi:10.7554/eLife.107085)
Supplement: Figure 8—figure supplement 1—source data 1. [file elife-107085-fig8-figsupp1-data1.xlsx]

## Sheet: Fig8 FS1A
TC AQP 1-1	Before					Pre-incubation					After
20	0.578308	0.574341	0.662231	0.800781	0.506287	0.535889	0.665234	0.603242	0.534265	0.635412	0.603452	0.547535	0.588436	0.677354	0.763453
40	0.484924	0.422974	0.693359	0.8977	0.768433	0.577698	0.675435	0.602134	0.592134	0.63623	0.635635	0.6234	0.599921	0.678568	0.700125
60	0.301208	0.677185	0.843201	0.547635	0.871582	0.588684	0.700213	0.623421	0.702342	0.612342	0.623634	0.642351	0.600023	0.689345	0.700012
80	0.402832	0.584412	0.620728	0.923412	0.959778	0.742798	0.799345	0.803241	0.783249	0.673245	0.853475	0.788234	0.792394	0.803242	0.777234
100	0.699158	0.456238	0.774536	0.784302	0.917053	0.870972	0.923402	0.932154	0.812342	0.923541	0.934635	0.902351	0.962314	0.901234	0.888923
120	0.885925	0.727844	1.15204	1.64581	1.11725	0.914612	1.04523	0.94352	1.23512	1.21234	0.946575	0.934221	0.923424	1.22342	1.12235
140	1.31622	1.26923	1.23566	1.71478	1.25854	1.38916	1.40421	1.34012	1.35123	1.10012	1.35437	1.35524	1.23221	1.34325	1.23253
160	1.59668	1.30035	1.61743	1.77673	1.70105	1.41418	1.62341	1.51231	1.45125	1.34314	1.51235	1.45235	1.65523	1.52523	1.55126
180	1.78741	1.7395	1.87561	2.14325	1.96655	1.9043	2.0432	1.82341	1.90242	2.00032	1.82356	1.70203	1.72342	1.77782	1.689
200	2.31476	2.26501	2.33002	2.2699	2.08862	2.06909	2.35424	2.12141	2.23241	2.22214	2.15699	2.00123	2.23241	2.14242	2.11134
220	2.47833	2.29919	2.39166	2.73041	2.49908	2.66998	2.70412	2.66214	2.73452	2.44264	2.54659	2.44235	2.62345	2.52134	2.32523
240	2.68463	2.5531	2.67578	3.08319	2.73163	2.67029	2.84231	2.77324	2.88823	2.62342	2.74569	2.73252	2.77755	2.74575	2.66633
260	3.25165	2.91962	3.23242	3.09906	2.93976	2.95624	3.04213	2.99924	2.90042	3.10052	2.93458	3.00021	3.00424	3.12335	2.90012
280	3.06	2.96173	3.21045	3.31055	2.80823	3.18878	3.23251	3.34124	3.23214	3.11132	3.34454	3.24214	3.11412	3.32134	3.22512
300	3.38409	3.48389	3.61542	3.4552	3.302	3.56873	3.51252	3.45433	3.42315	3.56438	3.43458	3.52345	3.55324	3.44142	3.31423
320	3.54675	3.65814	3.61115	3.47443	3.89954	3.67035	3.75213	3.62354	3.73452	3.62341	3.63457	3.55534	4.12148	3.67454	3.55253

## Sheet: Fig8 FS1B
TC AQP1-1
Before	Pre-incubation	After
1.59668	1.41418	1.51235
1.30035	1.62341	1.45235
1.61743	1.51231	1.65523
1.77673	1.45125	1.52523
1.70105	1.34314	1.55126
