# Supplementary material for: Activity-dependent CO2 production in the axon triggers opening of Connexin32 in the Schwann cell paranode
Source: eLife. 2026 Jul 6;14:RP107085. doi: 10.7554/eLife.107085 (PMC13336771; doi:10.7554/eLife.107085)
Supplement: Figure 8—figure supplement 2—source data 1. [file elife-107085-fig8-figsupp2-data1.xlsx]

## Sheet: Fig8 FS2C
ATP	ATP + GDPβS
3.24234	0.214432
4.21342	1.23234
2.24343	0.12422
3.44211	0.5324
4.77755	0.345426

## Sheet: Fig8 FS2E
Control	GDPβS
189.234	265.04
252.235	130.15
286.632	127.56
183.534	177.16
129.324	123.8
221.754	194.03
111.632	166.52
169.324	262.11
227.734	253.44
266.673	227.22
255.345	98.49
234.288	111.56
	120.36
	121.02
	229.632
