# Supplementary material for: Activity-dependent CO2 production in the axon triggers opening of Connexin32 in the Schwann cell paranode
Source: eLife. 2026 Jul 6;14:RP107085. doi: 10.7554/eLife.107085 (PMC13336771; doi:10.7554/eLife.107085)
Supplement: Figure 8—figure supplement 3—source data 1. [file elife-107085-fig8-figsupp3-data1.xlsx]

## Sheet: Fig8 FS3B
Control	NH4Cl
202.457	253.234
192.252	353.225
321.491	177.662
202.399	278.035
184.036	264.663
	201.83
	199.522
