# Supplementary material for: Activity-dependent CO2 production in the axon triggers opening of Connexin32 in the Schwann cell paranode
Source: eLife. 2026 Jul 6;14:RP107085. doi: 10.7554/eLife.107085 (PMC13336771; doi:10.7554/eLife.107085)
Supplement: Figure 8—figure supplement 4—source data 1. [file elife-107085-fig8-figsupp4-data1.xlsx]

## Sheet: Fig8 FS4C
AZ	NH4Cl
0.009024	0.139665
-1.9e-05	0.12112
-0.040412	0.147861
-0.011011	0.18999
-0.03102	0.191071
