# Supplementary material for: Activity-dependent CO2 production in the axon triggers opening of Connexin32 in the Schwann cell paranode
Source: eLife. 2026 Jul 6;14:RP107085. doi: 10.7554/eLife.107085 (PMC13336771; doi:10.7554/eLife.107085)
Supplement: Figure 8—source data 1. [file elife-107085-fig8-data1.xlsx]

## Sheet: Fig8B
Control	TC AQP1-1
244.639	7.577
322.342	7.095
262.627	8.549
194.234	7.424
183.324	7.937
222.321	5.926
312.324	46.81
245.235	6.967
333.324	7.202
277.324	6.48
	12.188
	8.646
	6.784
	37.396
	12.57
	5.682
	8.993
	7.783
	14.975
	56.209
	7.569
	5.508
	3.964
	25.575
	5.015
	6.718
	3.653
	6.419
