# Supplementary material for: Activity-dependent CO2 production in the axon triggers opening of Connexin32 in the Schwann cell paranode
Source: eLife. 2026 Jul 6;14:RP107085. doi: 10.7554/eLife.107085 (PMC13336771; doi:10.7554/eLife.107085)
Supplement: Figure 9—figure supplement 1—source data 1. [file elife-107085-fig9-figsupp1-data1.xlsx]

## Sheet: Fig9 FS1B Fret efficiency
Cx32WT + Cx32WT	Cx32WT + Cx32DN	Cx32WT + Cx43WT	Unbleached ROI
23.6364	39.1753	6.50794	0.324231
37.0909	29.7938	4.26984	0.132412
33.6364	24.0206	2.7619	1.32146
28.3636	34.0206	2.88889	0.124353
28.0909	38.4536	2.26984	1.32145
17.4545	38.7629	1.5873	2.22245
16.4545	25.9794	1	3.12414
31.2727	23.9175	1	0.00231423
15.1818	13.4021	1	0.134044
22.2727	8.04124	0.0793651	0.00432552
25.4545	15.6701	0.031746	0.000234512
14.0909	11.9588	0.206349	0.00235245
20.3636	15.1546	0.825397	0.255426
18.5455	15.9794		1.45479
22.1818	15.567		0.435667
16.7273	12.9897		0.435674
16.7273	20.4124		0.544747
10.0909	20.6186		0.888329
12.7273	24.2268		0.993429
16	24.5361		0.764678
	28.3505		0.377484
	21.6495		0.325437
	21.3402		0.436362
	24.0206		0.426225
	25.6701		0.000423525
	8.24742		0.00342523
			4.35121e-05
			0.000213412

## Sheet: Fig9 FS1B Bleaching efficiency
Cx32WT + Cx32WT		Cx32WT + Cx32DN		Cx32WT + Cx43WT		Unbleached ROI
83.0094		83.6364		79.0909		24.3887
82.3824		83.6364		79.5611		0.721003
81.442		83.6364		79.5611		6.05016
79.0909		84.2633		79.5611		6.05016
78.4639		84.2633		79.5611		6.52038
78.4639		81.1285		77.6803		6.52038
77.837		81.1285		77.6803		6.9906
81.2853		83.0094		77.6803		6.9906
79.2476		83.6364		77.21		6.83386
79.2476		86.1442		77.0533		6.83386
79.2476		86.1442		79.5611		6.83386
79.4044		86.1442		79.4044		6.83386
76.2696		84.7335		77.5235		6.83386
75.6426		84.7335		76.4263		6.83386
73.7618		85.047		84.1066		6.83386
72.8213		85.8307		84.1066		6.83386
74.3887		82.5392		82.3824		7.77429
76.1129		81.2853		82.8527		7.77429
77.837		79.5611		84.7335		7.77429
77.837		79.5611		84.7335		7.77429
76.4263		84.4201		82.5392		7.77429
74.0752		81.442		83.0094		7.30408
78.9342		87.2414		88.9655		7.30408
79.8746		74.7022		69.2163		7.30408
79.8746		75.1724		81.7555		10.9091
82.069		77.837		84.4201		10.9091
83.7931		79.5611				10.9091
83.6364		75.6426				10.9091
90.0627		85.047				9.34169
62.3197		85.047				9.02821
		85.047				9.02821
		85.047				15.6113
		91.6301				14.3574
		66.395				14.3574
						14.3574
						14.3574
						11.3793
						11.3793
						5.89342
						5.89342
						10.2821
						5.89342
						6.67712
						12.6332
						7.77429
						7.77429
						6.05016
						6.05016
						6.05016
						6.05016
						14.6708
						12.0063
						11.3793
