# Supplementary material for: Activity-dependent CO2 production in the axon triggers opening of Connexin32 in the Schwann cell paranode
Source: eLife. 2026 Jul 6;14:RP107085. doi: 10.7554/eLife.107085 (PMC13336771; doi:10.7554/eLife.107085)
Supplement: Figure 9—figure supplement 2—source data 1. [file elife-107085-fig9-figsupp2-data1.xlsx]

## Sheet: Fig9 FS2 Cx32WT x Cx32 WT
A level	FRET eficiency		DA Ratio	FRET Efficency
12286.8	10.0909		1.75679	10.0909
8167.9	12.7273		1.98642	12.7273
14265	14.0909		1.38148	14.0909
4688.26	15.1818		1.26049	15.1818
9580.56	16		2.34938	16
5147.18	16.4545		1.00617	16.4545
12380.9	16.7273		1.60617	16.7273
3586.41	16.7273		1.67531	16.7273
7379.4	17.4545		0.885185	17.4545
20498.1	18.5455		1.50494	18.5455
13509.1	20.3636		1.49259	20.3636
10172.3	22.1818		1.65309	22.1818
9746.52	22.2727		1.3321	22.2727
3751.2	23.6364		0.285185	23.6364
9209.26	25.4545		1.45802	25.4545
22041.2	28.0909		0.717284	28.0909
16721.5	28.3636		0.75679	28.3636
23950.6	31.2727		1.20617	31.2727
5222.27	33.6364		0.818519	33.6364
23620.8	37.0909		0.650617	37.0909

## Sheet: Fig9 FS2 Cx32DN x Cx32WT
A level	FRET eficiency		DA Ratio	FRET Efficency
2767.01	8.04124		1.33003	8.04124
8635.61	8.24742		4.03961	8.24742
8820.66	11.9588		1.57037	11.9588
6696.27	12.9897		1.77902	12.9897
4631.25	13.4021		1.01193	13.4021
11968.9	15.1546		1.65534	15.1546
3406.91	15.567		2.14767	15.567
7478.77	15.6701		1.35833	15.6701
5114.01	15.9794		1.8063	15.9794
3324.2	20.4124		1.7585	20.4124
5120.94	20.6186		1.60777	20.6186
13714.8	21.3402		1.97156	21.3402
5152.24	21.6495		1.80755	21.6495
4586.76	23.9175		1.18721	23.9175
14976	24.0206		0.539786	24.0206
3718.83	24.0206		2.09189	24.0206
21144.3	24.2268		1.59526	24.2268
21144.3	24.5361		1.67959	24.5361
11804.9	25.6701		2.54015	25.6701
13781.6	25.9794		1.07237	25.9794
8934.67	28.3505		1.96868	28.3505
5134.31	29.7938		0.38142	29.7938
11009	34.0206		0.639564	34.0206
13410.6	38.4536		0.884449	38.4536
23800.5	38.7629		1.48762	38.7629
9579.32	39.1753		0.374631	39.1753

## Sheet: Fig9 FS2 Cx32WT x Cx43WT
A level	FRET eficiency		DA Ratio	FRET Efficency
13488.3	0.031746		1.24654	0.031746
36681.7	0.0793651		0.997633	0.0793651
758.544	0.206349		2.35775	0.206349
11759	0.825397		3.13791	0.825397
13132.7	1		1.03435	1
22567.3	1		0.911621	1
9642.84	1		0.911621	1
9439.58	1.5873		0.921347	1.5873
8644.4	2.26984		1.19008	2.26984
34928.7	2.7619		0.79421	2.7619
9914.23	2.88889		0.974784	2.88889
38448.3	4.26984		0.987243	4.26984
13605.1	6.50794		0.804654	6.50794
