# Supplementary material for: Activity-dependent CO2 production in the axon triggers opening of Connexin32 in the Schwann cell paranode
Source: eLife. 2026 Jul 6;14:RP107085. doi: 10.7554/eLife.107085 (PMC13336771; doi:10.7554/eLife.107085)
Supplement: Figure 9—figure supplement 3—source data 1. [file elife-107085-fig9-figsupp3-data1.xlsx]

## Sheet: Fig9 FS3
Time(s)	Donor								Recipient
0	797.508	266.924	207.146	209.71	308.877	318.931	268.81	201.376	436.366	202.72	205.172	198.693	269.012	322.432	238.363	192.337
10	1254.94	1447.49	1214.88	578.476	377.377	391.944	323.476	200.243	701.656	319.345	246.538	240.784	337.867	411.053	288.614	191.679
20	1689.11	2348.72	1995.17	827.735	449.021	468.52	380.529	222.408	934.208	565.141	358.312	333.874	409.038	501.353	338.976	211.243
30	2067.11	3036.73	2619.45	1023.71	513.499	538.27	432.824	244.611	1140.89	864.801	512.074	447.894	478.878	588.167	388.152	224.015
40	2418.66	3586.15	3092.65	1274.77	571.665	599.936	478.954	265.071	1323.96	1178.75	690.043	587.383	540.701	664.582	431.39	237.65
50	2743.56	4016.36	3486.85	1483.21	617.167	651.447	516.635	281.593	1482.02	1479.93	877.147	739.208	595.36	733.838	469.508	247.211
60	3034.8	4356.94	3823.22	1677.48	678.255	716.227	563.577	292.976	1628.32	1780.12	1064.08	898.72	654.504	808.381	511.369	262.738
70	3287.54	4670.89	4099.18	1874.62	735.523	778.139	609.421	318.853	1759.2	2083.51	1248.3	1064.19	712.786	882.268	549.894	271.066
80	3528.19	4925.78	4338.35	2071.85	788.717	834.793	652.525	380.336	1876.77	2363.25	1428.38	1232.47	768.005	950.445	587.349	323.584
90	3737.35	5155.65	4539.28	2277.64	836.728	887.043	691.173	448.725	1979.38	2618.33	1604.3	1398.65	820.043	1016.76	624.356	376.29
100	3928.88	5362.64	4706.85	2457.62	878.836	933.419	725.067	567.648	2076.34	2859.78	1766.52	1563.98	867.806	1075.86	658.834	447.315
110	4103.65	5543.46	4851.32	2610.41	913.661	975.531	751.886	683.959	2167.16	3072.08	1925.23	1726.66	916.021	1141.84	692.904	516.328
120	4272.42	5707.12	4990.86	2730.89	935.395	1003.07	765.324	797.543	2241.98	3272.07	2076.81	1878.73	952.822	1193.65	721.862	585.994
130	4411.02	5844.72	5112	2834.95	955.236	1027.65	776.859	910.456	2312.04	3453.64	2219.76	2024.83	983.766	1238.77	747.665	653.833
140	4546.82	5994.48	5252.44	2940.03	976.634	1053.44	789.758	1006.64	2373.33	3616.92	2360.99	2160.68	1011.97	1279.07	773.507	720.244
150	4684.24	6105.73	5346.36	3037.33	999.209	1078.65	805.905	1103.31	2423.48	3781.15	2489.86	2299.61	1037.59	1316.6	797.001	774.926
160	4823.58	6217.35	5428.51	3110.42	1022.07	1104.61	821.815	1202.58	2462.67	3898.32	2604.15	2426.95	1065.66	1354.32	820.306	830.714
170	4926.96	6322.76	5509.63	3124.02	1038.09	1124.23	831.631	1296.31	2520.19	4003.9	2716.11	2533.87	1089.32	1388.33	840.661	882.069
180	5011.44	6413.27	5573.41	3128.06	1060.41	1148.33	849.28	1388.03	2564.69	4145.48	2813.24	2629.25	1114.88	1419.63	859.484	936.224
190	5123.04	6480.72	5650.45	3135.09	1087.31	1174.91	875.21	1481.63	2591.56	4265.14	2908.67	2709.27	1140.76	1447.51	877.336	988.323
200	5203.96	6552.97	5715.71	3152.7	1108.67	1196.78	894.211	1569.62	2628.72	4368.52	2993.73	2778.28	1162.03	1472.52	891.877	1044.53
210	5293.86	6621.85	5800.11	3165.64	1124.66	1213.87	907.919	1656.91	2657	4463.47	3077.65	2838.15	1181.4	1495.11	905.487	1099.17
220	5394.42	6678.81	5875.73	3186.55	1135.89	1227.53	915.999	1725.71	2690.71	4533.02	3162.15	2887.98	1196.8	1518.16	916.78	1140.53
230	5468.26	6755	5956.91	3216.54	1150.44	1243.18	928.723	1803.27	2718.27	4592.15	3238.6	2947.82	1214.38	1537.1	928.159	1182.27
240	5549.21	6814.26	6001.38	3238.26	1163.55	1257.17	939.164	1868.37	2737.93	4689.75	3308.62	2991.53	1229.59	1555.92	936.412	1213.89
250	5642.18	6839.72	6068.71	3256.18	1171.34	1267.28	943.767	1926.98	2757.45	4750.72	3372.29	3038.65	1243.52	1573.12	943.989	1241.66
260	5688.58	6895.77	6143.19	3274.24	1176.83	1274.79	946.061	1986.65	2779.74	4804.6	3435.53	3067.68	1252.73	1587.28	951.803	1268.33
270	5739.96	6925.11	6217.63	3305.03	1183.32	1282.28	950.799	2044.32	2803.26	4852.93	3500.83	3103.18	1262.1	1599.42	957.939	1298.06
280	5792.65	6951.22	6284.3	3325.83	1199.27	1297.63	963.802	2097.17	2825.77	4889.29	3557.09	3139.07	1273.36	1611.52	965.517	1338.34
290	5815.82	6982.19	6346.17	3356.64	1209.92	1308.59	972.6	2150.58	2843.91	4930.45	3603.97	3172.23	1282.25	1621.31	970.736	1370.56
300	5859	6974.37	6403.99	3375.38	1218.61	1317.28	979.867	2198.18	2867.13	4940.19	3655.3	3196.2	1290.83	1631.08	974.241	1396.57
