# Supplementary material for: Activity-dependent CO2 production in the axon triggers opening of Connexin32 in the Schwann cell paranode
Source: eLife. 2026 Jul 6;14:RP107085. doi: 10.7554/eLife.107085 (PMC13336771; doi:10.7554/eLife.107085)
Supplement: Figure 9—source data 1. [file elife-107085-fig9-data1.xlsx]

## Sheet: Fig9B
CX32DN -ve	CX32DN +ve
244	32
166	53
263	93
210	84
199	52
197	52
100	12
182	102
144	63
133	7
142	23
200	43
245	54
234	123
134	34
245	35
252	5
255	88
