# Supplementary material for: Activity-dependent CO2 production in the axon triggers opening of Connexin32 in the Schwann cell paranode
Source: eLife. 2026 Jul 6;14:RP107085. doi: 10.7554/eLife.107085 (PMC13336771; doi:10.7554/eLife.107085)
Supplement: Figure 10—figure supplement 1—source data 1. [file elife-107085-fig10-figsupp1-data1.xlsx]

## Sheet: Fig10 FS1 
Control	AZ
6.23314	23.2133
3.32	104.324
2.3142	50.3214
15.2314	47.3124
10.3252	77.231
12.3242	20.2342
22.325	35.312
12.324	63.2342
5.6432	49.2342
6.254	35.235
7.2342	34.3552
	44.3242
