# Supplementary material for: Activity-dependent CO2 production in the axon triggers opening of Connexin32 in the Schwann cell paranode
Source: eLife. 2026 Jul 6;14:RP107085. doi: 10.7554/eLife.107085 (PMC13336771; doi:10.7554/eLife.107085)
Supplement: Figure 12—figure supplement 1—source data 1. [file elife-107085-fig12-figsupp1-data1.xlsx]

## Sheet:  Fig12 FS1B
Control	AZ	TC AQP1-1
2.35969	5.15382	0.930556
1.76945	3.90888	0.765331
2.87527	4.30777	0.654638
2.85116	4.50891	0.551693
1.70323	4.03479	0.735787
4.29097	6.00487	-0.528434
1.42847	2.12924	-1.10657
2.37855	5.3379	-0.335583
2.56686	3.48835	-0.343958
1.86886	7.09337	-0.16415
1.87266	3.43314	-0.288106
2.5507	3.59403	-0.343366
1.355	4.35671	-0.225791
2.59386	3.87792	-0.363649
