# Supplementary material for: Activity-dependent CO2 production in the axon triggers opening of Connexin32 in the Schwann cell paranode
Source: eLife. 2026 Jul 6;14:RP107085. doi: 10.7554/eLife.107085 (PMC13336771; doi:10.7554/eLife.107085)
Supplement: Figure 12—source data 1. [file elife-107085-fig12-data1.xlsx]

## Sheet: Fig12D
Control	AZ	TC AQP1-1
2.01689	4.22131	0.04012
1.87238	5.05504	0.473621
1.30958	2.83657	0.55355
0.999229	3.64056	0.316156
0.907716	4.40545	0.418417
6.11584	8.35313	-0.0009598
1.86631	3.06255	-0.0020237
0.28608	1.19444	-0.0002364
2.17079	5.37471	0
